# Supplementary material
Source: PubMed Central journal article supplement (PMC5381513)
Supplement: NIHMS838481-supplement-1.pdf [file NIHMS838481-supplement-1.pdf]

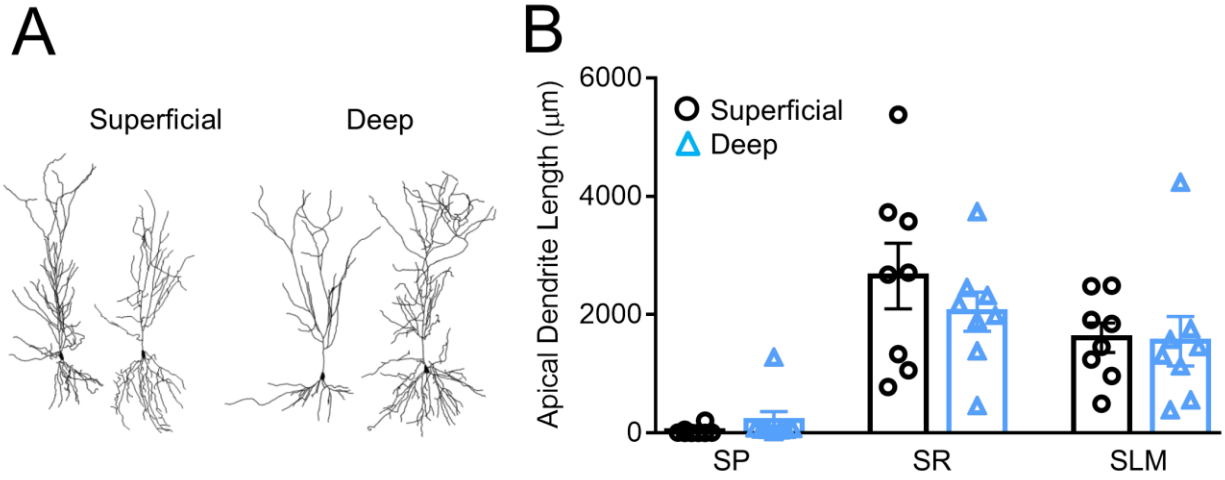

**Figure S1. Related to Figure 2. Morphological analysis of superficial and deep CA1 PN apical dendrites**  
**(A)** Examples of deep and superficial CA1 PN morphologies. **(B)** Quantification of apical dendritic length by stratum (n=8 sPN, 8 dPN). Error bars represent  $\pm$ SEM.

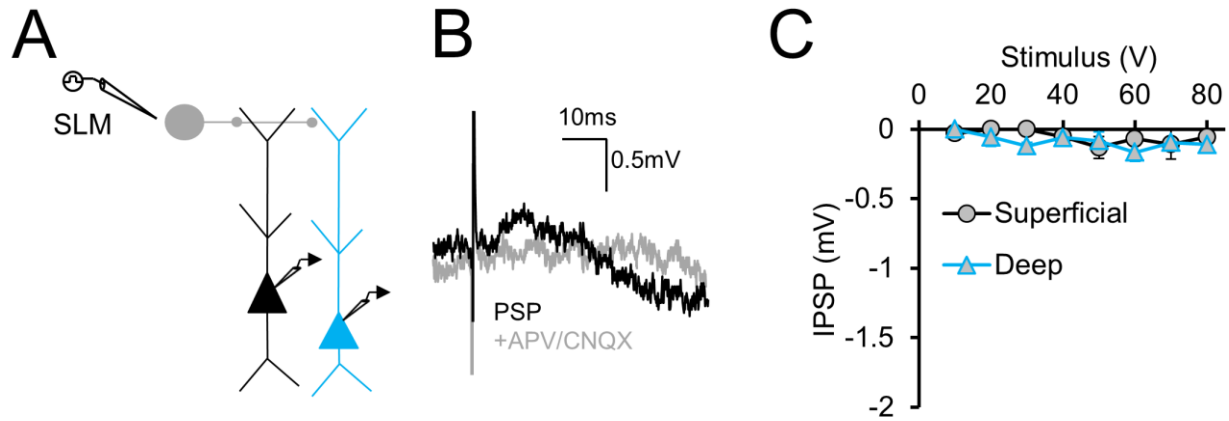

**Figure S2. Related to Figure 4. SLM stimulation-evoked inhibition to superficial and deep CA1 PNs has a minimal monosynaptic component**

(A) Diagram of experimental paradigm in which inhibitory responses to SLM stimulation are recorded in the presence of blockers of excitatory transmission. (B) Example showing the absence of directly-activated monosynaptic inhibition in a superficial CA1 PN in the presence of ionotropic glutamate receptor antagonists D-APV (50  $\mu$ M) and CNQX (10  $\mu$ M). (C) Input-output curves of SLM stimulation-evoked monosynaptic IPSPs in superficial and deep CA1 PNs (n=7 each). Error bars represent  $\pm$ SEM.

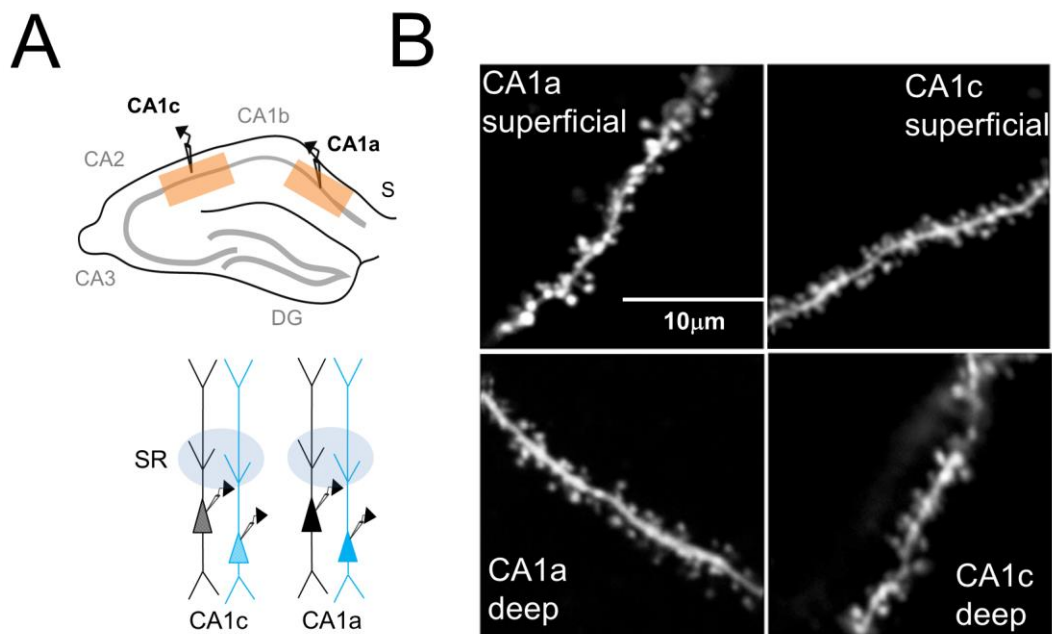

**Figure S3. Related to Figure 6. Spine imaging of CA1 PN apical dendrites in SR of CA1a and CA1c**  
**(A)** Schematic of regions targeted for spine density measurement (above and below). **(B)** Two-photon image of an oblique dendrite in SR of a CA1a superficial PN (upper left), CA1a deep PN (lower left), CA1c superficial PN (upper right), and CA1c deep PN (lower right).

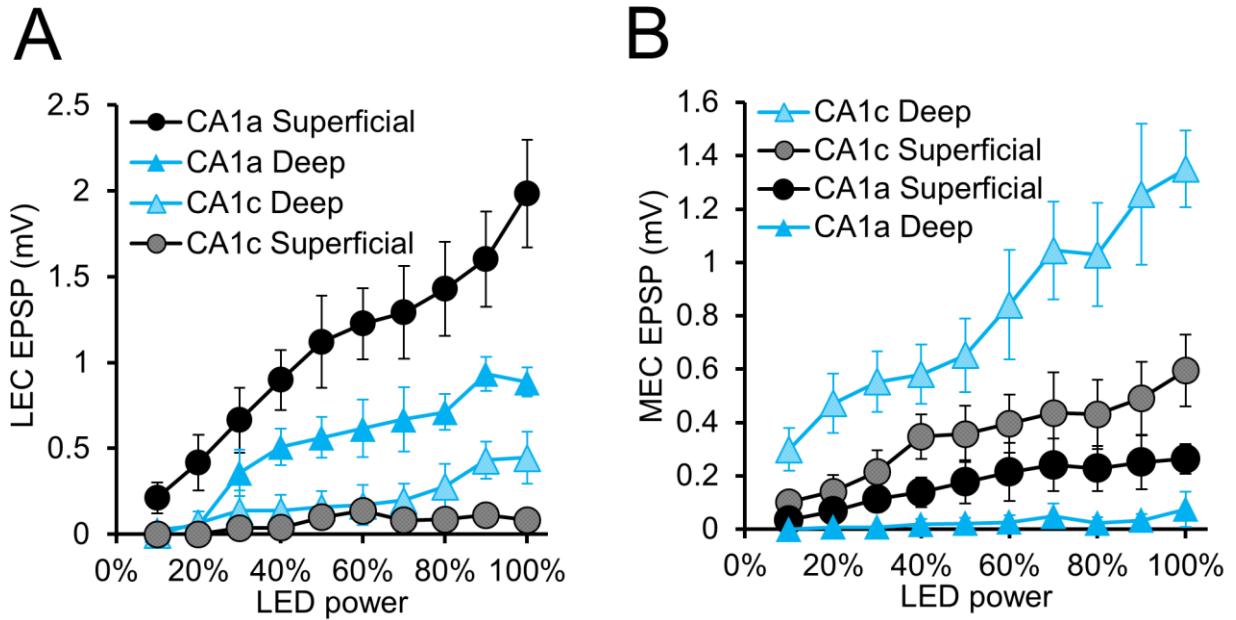

**Figure S4. Related to Figure 7. Voltage responses in CA1 PNs to optical stimulation of LEC and MEC axons expressing ChR2**

(A) Somatically-recorded EPSPs of CA1a and CA1c superficial and deep PNs in response to a range of intensities of 2 ms long light pulses with LEC axons expressing ChR2 (n=8 CA1a sPNs, 6 CA1a dPNs, 7 CA1c sPNs, 7 CA1c dPNs). (B) Somatically-recorded EPSPs of CA1a and CA1c superficial and deep PNs to photostimulation of MEC axons expressing ChR2 (n=6 each).
